# Supplementary material for: Thermo-oxidative ageing effect on mechanical properties and morphology of short fibre reinforced polyamide composites – comparison of carbon and glass fibres
Source: Royal Society of Chemistry journal article supplement (doi:10.1039/c7ra07884f), 2017-01-01
Supplement: c7ra07884f1.pdf [file c7ra07884f1.pdf]

## Supporting Information

Thermo-oxidative ageing effect on mechanical properties and morphology of short fibre reinforced polyamide composites- Comparison of carbon and glass fibres

Lin Sang<sup>a</sup>, Chuo Wang<sup>a</sup>, Yukai Wang<sup>a</sup>, Zhiyong Wei<sup>b\*</sup>

<sup>a</sup>*School of Automotive Engineering, State Key Laboratory of Structural Analysis for Industrial Equipment, Dalian University of Technology, Dalian 116024, China;*

<sup>b</sup>*Department of Polymer Science and Materials, School of Chemical Engineering, Dalian University of Technology, Dalian 116024, China;*

\*Corresponding author, E-mail: zywei@dlut.edu.cn

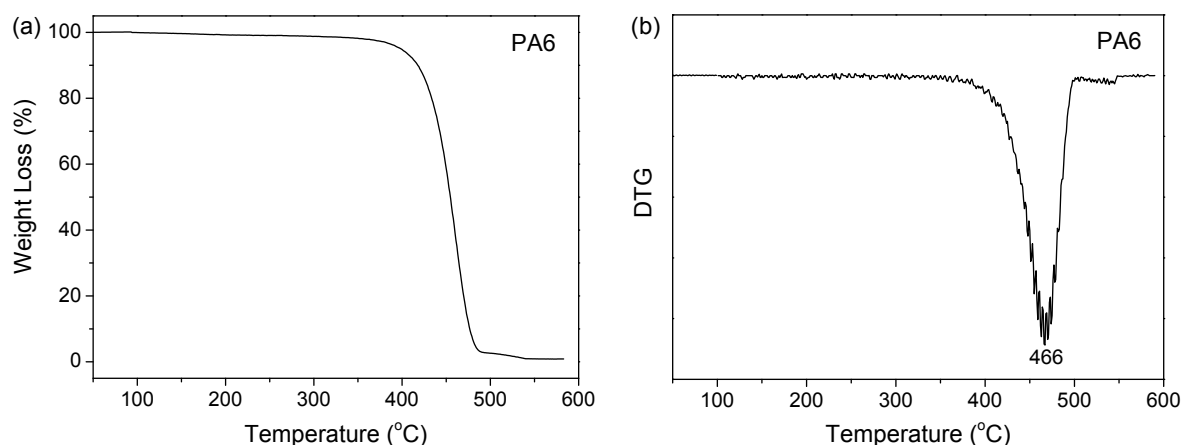

Fig.S1 (a) TGA and (b) DTG curve of the PA6 matrix

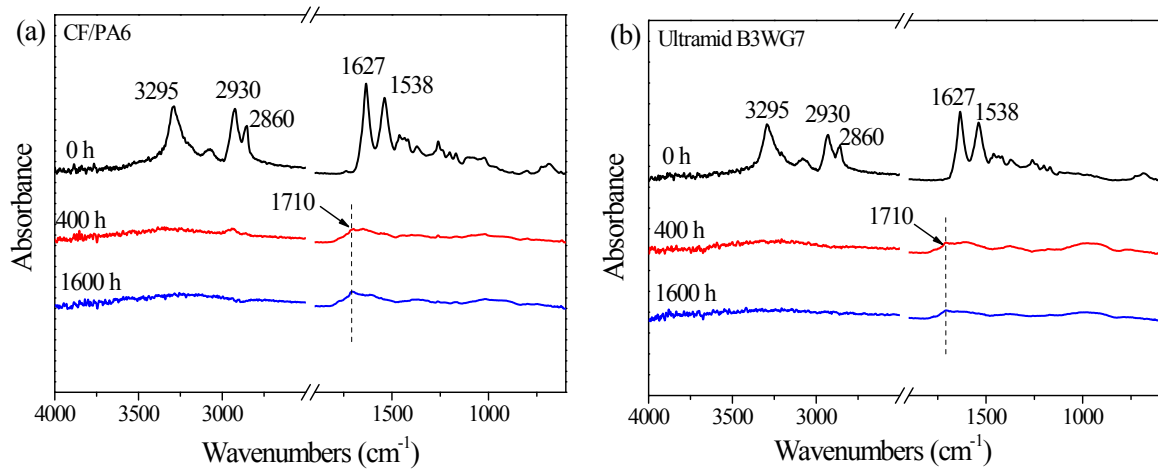

Fig.S2 ATR-FTIR spectra of CF/PA6 and Ultramid<sup>®</sup> B3WG7 specimens aging at 180°C for different aging period

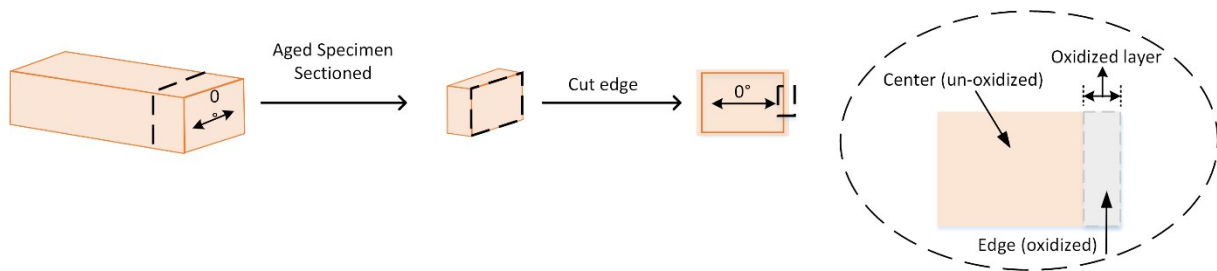

Fig.S3 Oxidation measurement procedures

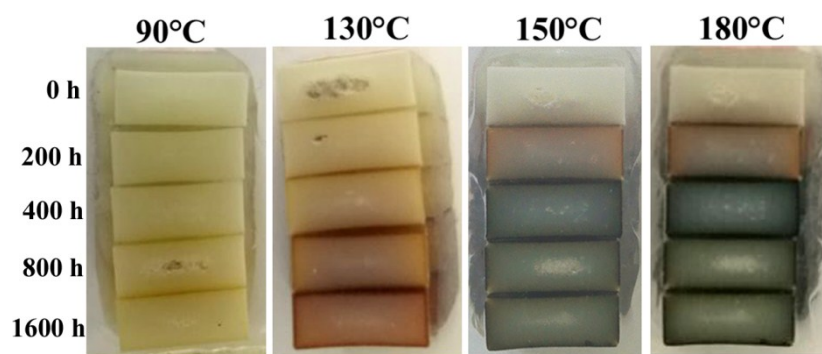

Fig. S4 Ultramid<sup>®</sup> B3WG7 specimens aged at 90, 130, 150, 180 °C for varying aging time under thermo-oxidative conditions (Samples were treated according to Fig. S3).
